# Supplementary material for: A computational model of spatio-temporal cardiac intracellular calcium handling with realistic structure and spatial flux distribution from sarcoplasmic reticulum and t-tubule reconstructions
Source: PubMed Central journal article supplement (PMC5597258; doi:10.1371/journal.pcbi.1005714), 2017-08-31
Supplement: pcbi.1005714.s002.pdf [file pcbi.1005714.s002.pdf]

# Supporting Information S1 - Model Description

## A Computational Model of Spatio-Temporal Cardiac Intracellular Calcium Handling with Realistic Structure and Spatial Flux Distribution from Sarcoplasmic Reticulum and T-tubule Reconstructions

Michael A. Colman\*<sup>1,3</sup>, Christian Pinali<sup>2</sup>, Andrew W. Trafford<sup>2</sup>, Henggui Zhang<sup>3</sup> and Ashraf Kitmitto<sup>2</sup>

<sup>1</sup> School of Biomedical Sciences, Faculty of Biological Sciences, University of Leeds, UK

<sup>2</sup> Division of Cardiovascular Sciences, Faculty of Biology, Medicine and Health Sciences, University of Manchester, UK

<sup>3</sup> School of Physics and Astronomy, Faculty of Engineering and Physical Sciences, University of Manchester, UK

\* Corresponding author

E-mail: [m.a.colman@leeds.ac.uk](mailto:m.a.colman@leeds.ac.uk) (MAC)

## Contents

---

|                                                         |    |
|---------------------------------------------------------|----|
| Variables.....                                          | 3  |
| Cell Structure .....                                    | 4  |
| Calcium Dynamics .....                                  | 4  |
| Diffusively coupled domains (cyto, rbSS, nSR).....      | 4  |
| Dyad and jSR .....                                      | 5  |
| Inter-domain diffusion .....                            | 5  |
| Ca <sup>2+</sup> Buffering.....                         | 6  |
| Instantaneous buffering in the cytoplasm.....           | 6  |
| Instantaneous buffering in the jSR.....                 | 6  |
| Troponin buffering and force.....                       | 6  |
| Reaction terms and flux definitions.....                | 9  |
| Dyad and jSR .....                                      | 9  |
| Intracellular Ca <sup>2+</sup> release, $J_{rel}$ ..... | 9  |
| L-type Calcium Flux, $J_{CaL}$ .....                    | 10 |
| SR fluxes.....                                          | 13 |
| Intracellular uptake through SERCA.....                 | 13 |
| SR Ca <sup>2+</sup> leak .....                          | 13 |
| Membrane Fluxes.....                                    | 14 |
| Sodium-Ca <sup>2+</sup> -exchanger, $J_{NaCa}$ .....    | 14 |
| Membrane Ca <sup>2+</sup> pump, $J_{pCa}$ .....         | 14 |
| Background Ca <sup>2+</sup> current.....                | 14 |
| Complete Equations for the Reaction Terms .....         | 15 |
| Ionic Model .....                                       | 15 |
| Initial Conditions.....                                 | 18 |
| References .....                                        | 19 |

## Variables

**Table S1: Ca<sup>2+</sup> handling model variables**

| Parameter               | Description                                                                | Unit                        |
|-------------------------|----------------------------------------------------------------------------|-----------------------------|
| $[Ca^{2+}]_{ds}$        | Average Ca <sup>2+</sup> concentration in the dyadic cleft                 | μM                          |
| $^m[Ca^{2+}]_{ds}$      | Ca <sup>2+</sup> concentration in dyad $m$                                 | μM                          |
| $[Ca^{2+}]_{rbSS}$      | Average Ca <sup>2+</sup> concentration in the subspace                     | μM                          |
| $^n[Ca^{2+}]_{rbSS}$    | Ca <sup>2+</sup> concentration in subspace voxel $n$                       | μM                          |
| $[Ca^{2+}]_{cyto}$      | Average Ca <sup>2+</sup> concentration in the bulk cytoplasm               | μM                          |
| $^n[Ca^{2+}]_{cyto}$    | Ca <sup>2+</sup> concentration in cytoplasm voxel $n$                      | μM                          |
| $[Ca^{2+}]_{nSR}$       | Average Ca <sup>2+</sup> concentration in the network SR                   | μM                          |
| $^q[Ca^{2+}]_{nSR}$     | Ca <sup>2+</sup> concentration in network SR voxel $q$                     | μM                          |
| $[Ca^{2+}]_{jSR}$       | Average Ca <sup>2+</sup> concentration in the junctional SR                | μM                          |
| $^m[Ca^{2+}]_{jSR}$     | Ca <sup>2+</sup> concentration in junctional SR $m$                        | μM                          |
| $^mJ_{rel}   J_{rel}$   | Release flux in dyad $m$   Whole cell average release flux                 | μM.ms <sup>-1</sup>         |
| $^mJ_{CaL}   I_{CaL}$   | LTCC flux in dyad $m$   Whole cell current                                 | μM.ms <sup>-1</sup>   pA/pF |
| $^qJ_{up}   J_{up}$     | SR Uptake flux in voxel $q$   Whole cell SR update flux                    | μM.ms <sup>-1</sup>         |
| $^qJ_{leak}   J_{leak}$ | SR leak flux in voxel $q$   Whole cell SR leak flux                        | μM.ms <sup>-1</sup>         |
| $^mJ_{ds}$              | Flux from dyad $m$ to rbSS voxel at $m$                                    | μM.ms <sup>-1</sup>         |
| $^nJ_{ss}$              | Flux from rbSS to cytoplasm voxel $n$                                      | μM.ms <sup>-1</sup>         |
| $^mJ_{jsr}$             | Flux from network to junctional SR at dyad $m$                             | μM.ms <sup>-1</sup>         |
| $^nJ_{trpn}$            | Trpn buffering flux at voxel $n$                                           | μM.ms <sup>-1</sup>         |
| $^pJ_{NaCa}   I_{NaCa}$ | Sodium-Ca <sup>2+</sup> exchanger flux in voxel $p$   Whole cell current   | μM.ms <sup>-1</sup>   pA/pF |
| $^pJ_{pCa}   I_{pCa}$   | PMCA Ca <sup>2+</sup> pump flux in voxel $p$   Whole cell current          | μM.ms <sup>-1</sup>   pA/pF |
| $J_{Cab}   I_{Cab}$     | Background Ca <sup>2+</sup> current flux in voxel $p$   Whole cell current | μM.ms <sup>-1</sup>   pA/pF |
| $^n\beta_{cyto}$        | Instantaneous buffering in the cytoplasm, voxel $n$                        | -                           |
| $^m\beta_{jSR}$         | Instantaneous buffering in the junctional SR, dyad $m$                     | -                           |
| $^nH_{trpn}$            | Ca <sup>2+</sup> bound to high affinity troponin sites, voxel $n$          | μM                          |
| $^nL_{trpn}$            | Ca <sup>2+</sup> bound to high affinity troponin sites, voxel $n$          | μM                          |
| $^m n_{o\_ryr}$         | Number of open RyRs in dyad $m$                                            | -                           |
| $^m CA$                 | Number of RyRs in the <u>C</u> losed <u>A</u> ctivated state, dyad $m$     | -                           |
| $^m OA$                 | Number of RyRs in the <u>O</u> pen <u>A</u> ctivated state, dyad $m$       | -                           |
| $^m CI$                 | Number of RyRs in the <u>C</u> losed <u>I</u> nactivated state, dyad $m$   | -                           |
| $^m OI$                 | Number of RyRs in the <u>O</u> pen <u>I</u> nactivated state, dyad $m$     | -                           |
| $csqn$                  | Free calsequestrin concentration                                           | mM                          |
| $^m M$                  | Proportion of csqn in monomer state, dyad $m$                              | -                           |
| $^m d_1$                | LTCC activation gate state 1, dyad $m$                                     | -                           |
| $^m d_2$                | LTCC activation gate state 2, dyad $m$                                     | -                           |
| $^m d_3$                | LTCC activation gate state 3, dyad $m$                                     | -                           |
| $^m f_1$                | LTCC voltage-dependent inactivation state 1, dyad $m$                      | -                           |
| $^m f_2$                | LTCC voltage-dependent inactivation state 2, dyad $m$                      | -                           |
| $^m fca_1$              | LTCC Ca <sup>2+</sup> -dependent inactivation state 1, dyad $m$            | -                           |
| $^m fca_2$              | LTCC Ca <sup>2+</sup> -dependent inactivation state 2, dyad $m$            | -                           |
| $V_m$                   | Membrane potential                                                         | mV                          |

## Cell Structure

**Table S2: Cell and voxel volumes and dimensions**

| Parameter                | Description                                                           | Value                                                        |
|--------------------------|-----------------------------------------------------------------------|--------------------------------------------------------------|
| $V_{cyto}$               | Total volume cytoplasm                                                | 49 695 $\mu\text{m}^3$                                       |
| $V_{cyto\_vox}/V_{vox}$  | Volume per voxel cytoplasm                                            | $3.137 \times 10^{-2} \mu\text{m}^3$                         |
| $V_{nsr}$                | Total volume network SR                                               | 1 826 $\mu\text{m}^3$                                        |
| $V_{nsr\_vox}$           | Volume per voxel nSR (1D strand map)                                  | $2.987 \times 10^{-3} \mu\text{m}^3$                         |
| $V_{rbSS}$               | Total volume of sub-space*                                            | 356 – 535 $\mu\text{m}^3$                                    |
| $V_{rbSS\_vox}$          | Volume per voxel sub-space**                                          | $2.703 \times 10^{-3} - 1.2825 \times 10^{-2} \mu\text{m}^3$ |
| $\langle V_{ds} \rangle$ | Average volume of individual dyad***                                  | $1.512 \times 10^{-3} \mu\text{m}^3$                         |
| $V_{jSR}$                | Volume individual jSR                                                 | $3.5 \times 10^{-2} \mu\text{m}^3$                           |
| $N_{cyto}$               | Number of voxels associated with the cytoplasm                        | 1 584 408                                                    |
| $N_{nSR}$                | Number of voxels associated with the nSR                              | 611 404                                                      |
| $N_{MEM}$                | Number of voxels associated with the surface sarcolemma and T-tubules | 463 624                                                      |
| $N_{Dyads}$              | Number of dyads / jSRs                                                | 17 458                                                       |

\* Volume is varied between simulations

\*\* Dependant on discretisation resolution of subspace

\*\*\* Varied between individual dyads within a single simulation

Total volume and dimensions are provided for the full-length cell model

## Calcium Dynamics

This section gives the fundamental equations describing  $\text{Ca}^{2+}$  dynamics in each of the five domains (cytoplasm, reduced buffering subspace, dyadic cleft, network and junctional SR).

### Diffusively coupled domains (cyto, rbSS, nSR)

In the three diffusively coupled domains, dynamics of  $\text{Ca}^{2+}$  concentration is described by the isotropic reaction diffusion equation:

$$\frac{d[\text{Ca}^{2+}]_{cyto,rbSS,nSR}}{dt} = \beta_{cyto,rbSS,nSR} \left( \mathbf{D}\nabla^2[\text{Ca}^{2+}]_{cyto,rbSS,nSR} + \phi_{cyto,rbSS,nSR} \right) \quad (1)$$

Where  $\Phi$  is a general reaction term,  $\beta$  is the instantaneous buffering term ( $\beta_{cyto}$  given below and where  $\beta_{nSR,rbSS} = 1$ ),  $\nabla^2$  is the spatial laplacian operator in 3-D and  $\mathbf{D}$  is the diffusion coefficient. At each voxel,  $n = 1, 2 \dots N_{cyto}$ , the laplacian is approximated by the 6 node nearest neighbour finite difference method:

$$\mathbf{D}\nabla^2 \cdot [\text{Ca}^{2+}]_{cyto,rbSS,nSR} \approx \sum_{x=x_1}^{x=x_3} \mathbf{D} \left( \frac{{}^{n_{x+1}}[\text{Ca}^{2+}]_{cyto,rbSS,nSR} + {}^{n_{x-1}}[\text{Ca}^{2+}]_{cyto,rbSS,nSR} - 2 \cdot {}^n[\text{Ca}^{2+}]_{cyto,rbSS,nSR}}{\Delta x^2} \right) \quad (2)$$

Where  $\Delta x$  is the spatial discretisation step,  $x_1$ - $x_3$  are the three spatial dimensions and  $n_{x \pm 1}$  refers to each of the 2 neighbours in each dimension. In the cytoplasm and rbSS domains these correspond to the standard 6 nearest-neighbours (i.e.,  $\pm \Delta x$  in the x, y and z directions); in the nSR for the full structural model, these are defined by the neighbourhood map from the full resolution reconstruction.

## Dyad and jSR

For each dyad and jSR, where  $m$  is the subset of voxels which contain a dyad ( $m = 1, 2 \dots N_{dyads}$ ):

$$\frac{d^m [Ca^{2+}]_{ds}}{dt} = \beta \left( {}^m J_{rel} + {}^m J_{CaL} - {}^m J_{ds} \right) \quad (3)$$

$$\frac{d^m [Ca^{2+}]_{jSR}}{dt} = \beta \left( - {}^m J_{rel} \left( \frac{v_{ds}}{v_{jSR}} \right) - {}^m J_{jSR} \right) \quad (4)$$

Fluxes  $J_{rel}$  and  $J_{CaL}$  are given in the section *Reaction Terms and Flux Definition* and  $J_{ds}$  and  $J_{jSR}$  given in the next sub-section; all are dependent on local  $Ca^{2+}$  concentrations.

Due to the small volume of the dyadic cleft, an analytical description can be found for the dyadic cleft  $Ca^{2+}$  concentration under the approximation that the volume reaches its steady-state concentration within the time-step,  $\Delta t$ . Thus, by setting:

$$\frac{d [Ca^{2+}]_{ds}}{dt} = 0 \quad (5)$$

An approximation for equation (3) can be obtained as [1]:

$${}^m [Ca^{2+}]_{ds} = {}^{\theta(m)} [Ca^{2+}]_{rbSS} + \frac{\tau_{ds} \cdot \left( {}^m k_{rel} \cdot {}^m [Ca^{2+}]_{jSR} + {}^m J_{CaL} \right)}{\left( 1 + \tau_{ds} \cdot {}^m k_{rel} \right)} \quad (6)$$

Where  $\theta(m)=n$  is the dyad mapping function (inverse map  $\theta^{-1}(n)=m$ ).  $k_{rel}$  is given in the sub-section *Reaction Terms and Flux Definition: Dyad Fluxes*.

## Inter-domain diffusion

Free  $Ca^{2+}$  diffusion occurs between the dyadic cleft and rbSS, the rbSS and bulk cytoplasm, and the network and junctional SR [2].

Dyadic cleft to rbSS:

$${}^m J_{ds} = \left( {}^m [Ca^{2+}]_{ds} - {}^{\theta(m)} [Ca^{2+}]_{rbSS} \right) \tau_{ds}^{-1} \quad (7)$$

rbSS to cytoplasm:

$${}^n J_{ss} = \left( {}^n [Ca^{2+}]_{rbSS} - {}^n [Ca^{2+}]_{cyto} \right) \tau_{ss}^{-1} \quad (8)$$

Network to junctional SR:

$${}^m J_{jSR} = \left( {}^m [Ca^{2+}]_{jSR} - {}^{\theta(m)} [Ca^{2+}]_{nSR} \right) \tau_{jSR}^{-1} \quad (9)$$

**Table S3: Free Ca<sup>2+</sup> diffusion parameters**

| Parameter         | Description                                          | Value                             |
|-------------------|------------------------------------------------------|-----------------------------------|
| $D$               | Diffusion coefficient (cytoplasm, nSR)               | 0.3 $\mu\text{m}/\text{ms}$       |
| $D_{rbSS}$        | Diffusion coefficient (rbSS)*                        | 0.3 – 1.0 $\mu\text{m}/\text{ms}$ |
| $\Delta x$        | Spatial discretisation step                          | 0.35 $\mu\text{m}$                |
| $\Delta x_{rbSS}$ | Spatial discretisation step (rbSS)**                 | 0.35 – 1.4 $\mu\text{m}$          |
| $\tau_{ds}$       | Time constant diffusion dyad $\rightarrow$ rbSS      | 0.022 ms                          |
| $\tau_{ss}$       | Time constant diffusion rbSS $\rightarrow$ cytoplasm | 0.1 ms                            |
| $\tau_{jSR}$      | Time constant diffusion jSR $\rightarrow$ nSR        | 5 ms                              |

\* Varied between simulations

\*\* Dependant on discretisation resolution

## Ca<sup>2+</sup> Buffering

### Instantaneous buffering in the cytoplasm

Instantaneous buffering in the cytoplasm follows that of previous models, e.g., Restrepo et al [2] and Nivala et al. [3], based on [4]. At each voxel,  $n$ , the buffering term is given by:

$${}^n\beta_{cyto} = \left[ 1 + \sum_x \frac{B_x K_x}{\left( {}^n[Ca^{2+}]_{cyto} + K_x \right)^2} \right]^{-1} \quad (10)$$

Where  $x$  refers to four buffering processes: Calmodulin, SR sites, Myosin (Ca) and Myosin (Mg).

### Instantaneous buffering in the jSR

Buffering in the jSR follows that of the previous study Gaur-Rudy [5]:

$${}^m\beta_{jSR} = \left[ 1 + \frac{B_{csqn} K_{mcsqn}}{\left( {}^m[Ca^{2+}]_{jSR} + K_{mcsqn} \right)^2} \right]^{-1} \quad (11)$$

### Troponin buffering and force

Troponin buffering and force generation is from the Gauthier et al model [6,7]:

$${}^n J_{trpn} = \frac{dH_{trpn,Ca}}{dt} + \frac{dL_{trpn,Ca}}{dt} \quad (12)$$

$$\frac{d{}^n H_{trpn,Ca}}{dt} = k_{H,trpn}^+ \left[ Ca^{2+} \right]_{cyto} \left( B_{H,trpn} - H_{trpn,Ca} \right) - k_{H,trpn}^- H_{trpn,Ca} \quad (13)$$

$$\frac{d{}^n L_{trpn,Ca}}{dt} = k_{L,trpn}^+ \left[ Ca^{2+} \right]_{cyto} \left( B_{L,trpn} - L_{trpn,Ca} \right) - k_{L,trpn}^- \left( 1 - \frac{2}{3} F_{norm} \right) L_{trpn,Ca} \quad (14)$$

Where  $F_{norm}$  is the normalised force:

$$F_{norm} = \left( \frac{P_1 + N_1 + 2P_2 + 3P_3}{P_1^{max} + 2P_2^{max} + 3P_3^{max}} \right) \quad (15)$$

And:

$$\phi = 1 + \frac{2.3 - SL}{(2.3 - 1.7)^{1.6}} \quad (16)$$

$$f_{01} = 3f_{XB} \quad (17)$$

$$f_{12} = 10f_{XB} \quad (18)$$

$$f_{23} = 7f_{XB} \quad (19)$$

$$g_{01} = g_{XB} \quad (20)$$

$$g_{12} = 2g_{XB} \quad (21)$$

$$g_{23} = 3g_{XB} \quad (22)$$

$$g_{01,SL} = 1\phi g_{XB,\min} \quad (23)$$

$$g_{12,SL} = 2\phi g_{XB,\min} \quad (24)$$

$$g_{23,SL} = 3\phi g_{XB,\min} \quad (25)$$

$$K_{TRPN}^{Ca} = \frac{k_{L,TRPN}^-}{k_{L,TRPN}^+} \quad (26)$$

$$N_{TRPN} = 3.5SL - 2.0 \quad (27)$$

$$K_{1/2}^{TRPN} = \left[ 1 + \frac{K_{TRPN}^{Ca}}{1.4 \times 10^{-3} - 8 \times 10^{-4} ((SL - 1.7)/0.6)} \right]^{-1} \quad (28)$$

$$k_{np,TRPN} = k_{pn,TRPN} \left( \frac{[TRPN_{Ca}^L]}{K_{1/2}^{TRPN} TRPN_{tot}^L} \right)^{N_{TRPN}} \quad (29)$$

$$\sum Paths = g_{01}g_{12}g_{23} + f_{01}g_{12}g_{23} + f_{01}f_{12}g_{23} + f_{01}f_{12}f_{23} \quad (30)$$

$$P_1^{\max} = \frac{f_{01}g_{12}g_{23}}{\sum Paths} \quad (31)$$

$$P_2^{\max} = \frac{f_{01}f_{12}g_{23}}{\sum Paths} \quad (32)$$

$$P_3^{\max} = \frac{f_{01}f_{12}f_{23}}{\sum Paths} \quad (33)$$

$$\frac{dP_0}{dt} = -(k_{pn,TRPN} + f_{01})P_0 + k_{np,TRPN}N_0 + g_{01,SL}P_1 \quad (34)$$

$$\frac{dP_1}{dt} = -(k_{pn,TRPN} + f_{12} + g_{01,SL})P_1 + k_{np,TRPN}N_1 + f_{01}P_0 + g_{12,SL}P_1 \quad (35)$$

$$\frac{dP_2}{dt} = -(f_{23} + g_{12,SL})P_2 + f_{12}P_1 + g_{23,SL}P_3 \quad (36)$$

$$\frac{dP_3}{dt} = -g_{23,SL}P_3 + f_{23,SL}P_2 \quad (37)$$

$$\frac{dN_1}{dt} = k_{pn,TRPN}P_1 - (k_{np,TRPN} + g_{01,SL})N_1 \quad (38)$$

$$\frac{dN_0}{dt} = \frac{dP_0}{dt} - \frac{dP_1}{dt} - \frac{dP_2}{dt} - \frac{dP_3}{dt} - \frac{dN_1}{dt} \quad (39)$$

**Table S4: Ca<sup>2+</sup> buffering parameters**

| Parameter       | Description                                  | Value                               |
|-----------------|----------------------------------------------|-------------------------------------|
| $K_{CAM}$       | Dissociation constant for calmodulin         | 7.0 $\mu\text{M}$                   |
| $B_{CAM}$       | Total concentration buffering sites          | 24.0 $\mu\text{M}$                  |
| $K_{SR}$        | Dissociation constant for SR sites           | 1.08 $\mu\text{M}$                  |
| $B_{SR}$        | Total concentration buffering sites          | 47.0 $\mu\text{M}$                  |
| $K_{M,Ca}$      | Dissociation constant for Myosin (Ca)        | 0.01155 $\mu\text{M}$               |
| $B_{M,Ca}$      | Total concentration buffering sites          | 49.0 $\mu\text{M}$                  |
| $K_{M,Mg}$      | Dissociation constant for Myosin (Mg)        | 6.552 $\mu\text{M}$                 |
| $B_{M,Mg}$      | Total concentration buffering sites          | 140 $\mu\text{M}$                   |
| $K_{mcsqn}$     | Dissociation constant for csqn               | 0.8 mM                              |
| $B_{csqn}$      | Total concentration buffering sites          | 10 mM                               |
| $K^H_{H, trpn}$ | On rate for troponin high affinity sites     | 100 $\text{mM}^{-1} \text{ms}^{-1}$ |
| $K_{H, trpn}$   | Off rate for troponin high affinity sites    | 1.0 $\times 10^{-3} \text{ms}^{-1}$ |
| $K^L_{L, trpn}$ | On rate for troponin low affinity sites      | 100 $\text{mM}^{-1} \text{ms}^{-1}$ |
| $K_{L, trpn}$   | Off rate for troponin low affinity sites     | 4.0 $\times 10^{-2} \text{ms}^{-1}$ |
| $B_{H, trpn}$   | Total high affinity sites on troponin        | 0.14 mM                             |
| $B_{L, trpn}$   | Total low affinity sites on troponin         | 0.7 mM                              |
| $f_{XB}$        | Weak to strong cross bridge transition rate  | 0.05 $\text{ms}^{-1}$               |
| $g_{XB, min}$   | Maximum strong to weak rate                  | 0.1 $\text{ms}^{-1}$                |
| $SL$            | Sarcomere length                             | 2.15 $\mu\text{m}$                  |
| $K_{pn,TRPN}$   | Permissive to non-permissive transition rate | 0.04 $\text{ms}^{-1}$               |



## Reaction terms and flux definitions

Thus far, only the contributions of free  $Ca^{2+}$  diffusion to the reaction terms have been defined. In this section, the full reaction terms and their governing equations are described.

### Dyad and $jSR$

Other than free  $Ca^{2+}$  diffusion, the only fluxes acting into the dyad are  $J_{rel}$  and  $J_{CaL}$  described by the RyR and LTCC models, respectively.

Intracellular  $Ca^{2+}$  release,  $J_{rel}$

$${}^m J_{rel} = {}^m k_{rel} \left( {}^m [Ca^{2+}]_{jSR} - {}^m [Ca^{2+}]_{ds} \right) \quad (40)$$

$${}^m k_{rel} = {}^m n_{o\_RyR} \cdot g_{RyR} \cdot {}^m v_{ds}^{-1} \quad (41)$$

${}^m n_{o\_RyR}$  is the number of open RyR channels in dyad  $m$ . RyR dynamics is described by a 4-state Markov Chain model. The model is similar to Stern et al [8] and Restrepo et al [2], with a functional monomer induced inactivation based on csqn dynamics described by Gaur-Rudy [5].

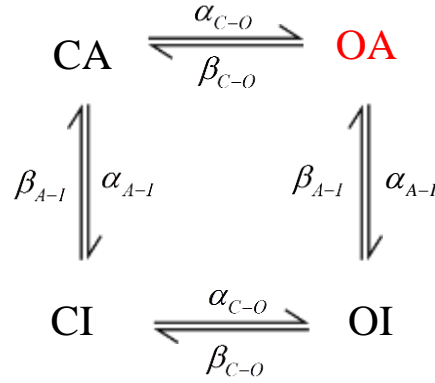

$$\frac{d {}^m CA}{dt} = {}^m OA \cdot \beta_{C-O} + {}^m CI \cdot \beta_{A-I} - {}^m CA \cdot (\alpha_{C-O} + \alpha_{A-I}) \quad (42)$$

$$\frac{d {}^m OA}{dt} = {}^m CA \cdot \alpha_{C-O} + {}^m OI \cdot \beta_{A-I} - {}^m OA \cdot (\beta_{C-O} + \alpha_{A-I}) \quad (43)$$

$$\frac{d {}^m CI}{dt} = {}^m OI \cdot \beta_{C-O} + {}^m C \cdot \alpha_{A-I} - {}^m CI \cdot (\alpha_{C-O} + \beta_{A-I}) \quad (44)$$

$$\frac{d {}^m OI}{dt} = {}^m CI \cdot \alpha_{C-O} + {}^m OA \cdot \alpha_{A-I} - {}^m OI \cdot (\beta_{C-O} + \beta_{A-I}) \quad (45)$$

Where:

$$\alpha_{C-O} = k_a \left( {}^m [Ca^{2+}]_{ds} \right)^H \quad (46)$$

$$\beta_{C-O} = k_b \quad (47)$$

$$\alpha_{A-I} = (1 - {}^m Mi_{ss}) / \tau_{Mi,1} \quad (48)$$

$$\beta_{A-I} = {}^m Mi_{ss} / \tau_{Mi,2} \quad (49)$$

$${}^m Mi_{ss} = 1 / \left( 1 + e^{({}^m M - 0.5) / 0.04167} \right) \quad (50)$$

$$\frac{dM}{dt} = \alpha_M (1 - M) + \beta_M M \quad (51)$$

$$\alpha_M = M_{ss} / \tau_{M,1} \quad (52)$$

$$\beta_M = (1 - M_{ss}) / \tau_{M,2} \quad (53)$$

$$M_{ss} = 1 / \left( 1 + e^{(-6.5 \cdot (csqn - 6.37))} \right) \quad (54)$$

$$csqn = B_{csqn} \cdot K_{mcsqn} / \left( {}^m [Ca^{2+}]_{jSR} + K_{mcsqn} \right) \quad (55)$$

In this model, OA is the only state in which a flux occurs. Thus,  ${}^m n_{o\_RyR}$  is equal to the number of channels in dyad  $m$  which are in state OA (red text in schematic).

#### L-type Calcium Flux, $J_{CaL}$

The flux through the L-type Calcium Current is defined as:

$${}^m J_{CaL} = -{}^m n_{o\_LTCC} {}^m \bar{J}_{CaL} \quad (56)$$

Where  ${}^m n_{o\_LTCC}$  is the number of open LTCC channels in dyad  $m$  (defined below) and  $\bar{J}_{CaL}$  is the maximal flux rate per channel [9]:

$${}^m \bar{J}_{CaL} = 4P_{Ca} zF \frac{\frac{1}{2} \gamma_{Ca} {}^m [Ca^{2+}]_{ds} e^{2z} - \gamma_{Ca} [Ca^{2+}]_o}{e^{2z} - 1} \quad (57)$$

$$z = \frac{V_m F}{RT} \quad (58)$$

Where  $[Ca^{2+}]_o$  is the extracellular  $Ca^{2+}$  concentration,  $P_{Ca}$  is the maximum permeability of an individual LTCC and  $F$  is the Faraday constant.

The LTCCs are described by a Markov Chain construction of a Hodgkin-Huxley model [9,10]

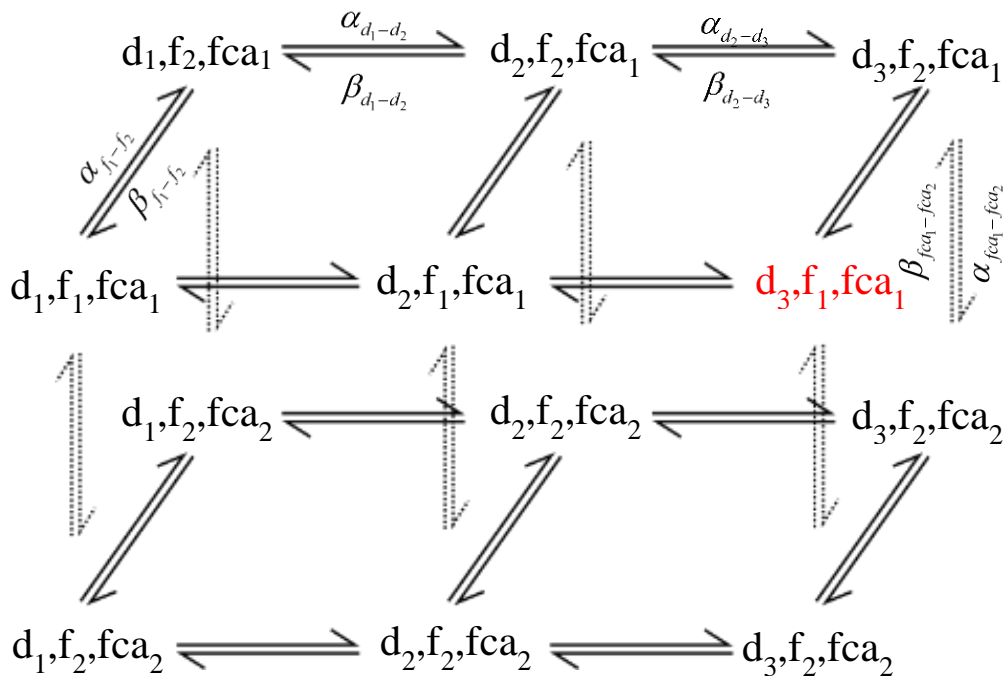

Which is equivalent to the three gate Hodgkin-Huxley model:

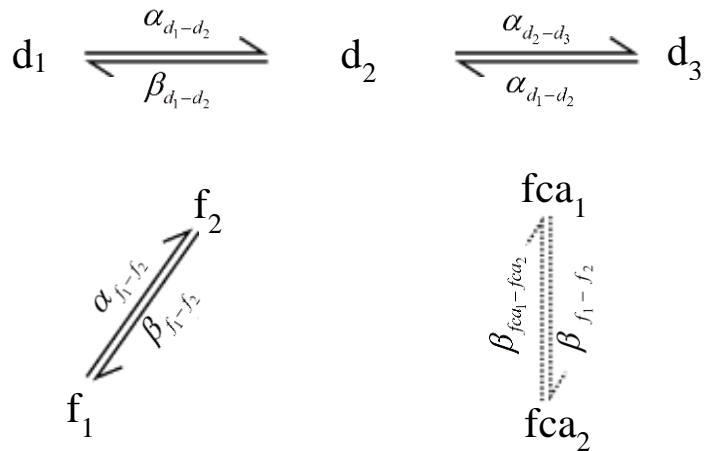

And thus described by:

$$\frac{d(d_1)}{dt} = d_2\beta_{d_1-d_2} - d_1\alpha_{d_1-d_2} \tag{59}$$

$$\frac{d(d_2)}{dt} = d_1\alpha_{d_1-d_2} + d_3\beta_{d_2-d_3} - d_2(\beta_{d_1-d_2} + \alpha_{d_2-d_3}) \tag{60}$$

$$\frac{d(d_3)}{dt} = d_2\alpha_{d_2-d_3} - d_3\beta_{d_2-d_3} \quad (61)$$

$$\frac{d(f_1)}{dt} = f_2\beta_{f_1-f_2} - f_1\alpha_{f_1-f_2} \quad (62)$$

$$\frac{d(fca_1)}{dt} = fca_2\beta_{fca_1-fca_2} - fca_1\alpha_{fca_1-fca_2} \quad (63)$$

Where the transition rates for each variable couplet, ( $x = d_1-d_2, f_1-f_2, fca_1-fca_2$ ) are defined from the steady-state and time constant in the standard way:

$$\alpha_x = x_{ss} / \tau_x \quad (64)$$

$$\beta_x = (1 - x_{ss}) / \tau_x \quad (65)$$

And:

$$\alpha_{d_2-d_3} = k_{d2d3} \quad (66)$$

$$\beta_{d_2-d_3} = k_{d3d2} \quad (67)$$

$$d_{ss} = 1 / \left( 1 + e^{-(V_m - 5)/6.24} \right) \quad (68)$$

$$\tau_d = d_{ss} \cdot \left( 1 - e^{-(V_m - 5)/6.24} \right) / (0.035(V_m - 5)) \quad (69)$$

$$f_{ss} = 1 - 1 / \left( 1 + e^{(V_m + 32.06)/8.6} \right) \quad (70)$$

$$\tau_f = 2 / \left( 0.0197 e^{-\left( [0.0337(V_m + 7)]^2 + 0.02 \right)} \right) \quad (71)$$

$$fca_{ss} = 1 - 1 / \left( 1 + \left( {}^m [Ca^{2+}]_{ds} / \bar{Ca} \right)^2 \right) \quad (72)$$

Note that the steady states of the inactivation gates ( $f, fca$ ) are inverse to those in the standard Hodgkin-Huxley model because in this Markov description  $f_2$  is the inactivated state, equivalent to  $(1-f)$  in the standard description (and  $f_1$  is equivalent to  $f$ ).

**Table S5: RyR and LTCC flux parameters**

| Parameter            | Description                                                         | Value                                                    |
|----------------------|---------------------------------------------------------------------|----------------------------------------------------------|
| $g_{RyR}$            | Maximal flux rate through the RyRs                                  | $2.05 \times 10^{-4} \mu\text{M}^3 \text{ms}^{-1}$       |
| $P_{Ca}$             | Maximum permeability of LTCC                                        | $11.9 \mu\text{mol C}^{-1} \text{ms}^{-1}$               |
| $\gamma_{Ca}$        | Activity Coefficient LTCC                                           | 0.341                                                    |
| $N_{RyR}$            | Number of RyRs per dyad*                                            | 100                                                      |
| $H$                  | RyR Open rate $\text{Ca}^{2+}$ power                                | 2.5                                                      |
| $k_a$                | RyR activation rate constant                                        | $0.617 \times 10^{-4} \mu\text{M}^{-2.5} \text{ms}^{-1}$ |
| $k_b$                | RyR deactivation rate constant                                      | $1.0 \text{ms}^{-1}$                                     |
| $\tau_{M,1}$         | Time constant of monomer binding                                    | 5 ms                                                     |
| $\tau_{Mi,1}$        | Time constant of monomer inactivation                               | 5 ms                                                     |
| $\tau_{M,2}$         | Time constant monomer unbinding                                     | 213 ms                                                   |
| $\tau_{Mi,2}$        | Time constant of de-inactivation                                    | 30 ms                                                    |
| $N_{LTCC}$           | Number of L-type $\text{Ca}^{2+}$ channels per dyad*                | 15                                                       |
| $k_{d2d3}$           | Rate constant for transition $d_2-d_3$                              | $0.3 \text{ms}^{-1}$                                     |
| $k_{d3d2}$           | Rate constant for transition $d_3-d_2$                              | $6.0 \text{ms}^{-1}$                                     |
| $\tau_{fca}$         | Time constant for $\text{Ca}^{2+}$ induced inactivation             | 15 ms                                                    |
| $\bar{C}_a$          | $\text{Ca}^{2+}$ constant for $\text{Ca}^{2+}$ induced inactivation | $6.0 \mu\text{M}$                                        |
| $[\text{Ca}^{2+}]_o$ | Extracellular $\text{Ca}^{2+}$ concentration                        | 1.8 mM                                                   |

\*Can be varied between individual dyads and simulations

### SR fluxes

Flux between the SR and the cytoplasm are  $J_{up}$  and  $J_{leak}$ , where  $q$  is the subset of cytoplasm voxels which contain an SR ( $q = 1, 2 \dots N_{SR}$ ). These equations are based on Restrepo et al [2] and preceding studies [11,12].

#### Intracellular uptake through SERCA

$${}^q J_{up} = g_{up} \frac{\left( \theta_{SR}(q) [\text{Ca}^{2+}]_{cyto} / K_{cyto} \right)^2 - \left( {}^q [\text{Ca}^{2+}]_{nSR} / K_{nSR} \right)^2}{1 + \left( \theta_{SR}(q) [\text{Ca}^{2+}]_{cyto} / K_{cyto} \right)^2 + \left( {}^q [\text{Ca}^{2+}]_{nSR} / K_{nSR} \right)^2} \quad (73)$$

Where  $\theta_{SR}(q)=n$  is the SR mapping function (inverse map  $\theta_{SR}^{-1}(n)=q$ ) and  $g_{up}$  is the maximal flux rate.

#### SR $\text{Ca}^{2+}$ leak

$${}^q J_{leak} = g_{leak} \frac{{}^q [\text{Ca}^{2+}]_{nSR}^2}{{}^q [\text{Ca}^{2+}]_{nSR}^2 + K_{leak}^2} \left( {}^q [\text{Ca}^{2+}]_{nSR} - \theta_{SR}(q) [\text{Ca}^{2+}]_{cyto} \right) \quad (74)$$

**Table S6:  $\text{Ca}^{2+}$  uptake and leak parameters**

| Parameter  | Description                      | Value                                      |
|------------|----------------------------------|--------------------------------------------|
| $g_{up}$   | Maximal flux rate of $J_{up}$    | $0.12161 \mu\text{M} \cdot \text{ms}^{-1}$ |
| $K_{cyto}$ | Cytoplasm constant for $J_{up}$  | $0.15 \mu\text{M}$                         |
| $K_{nSR}$  | Network SR constant for $J_{up}$ | $1700 \mu\text{M}$                         |
| $g_{leak}$ | Maximal flux rate of $J_{leak}$  | $1.28422 \times 10^{-5} \text{ms}^{-1}$    |
| $K_{leak}$ | $J_{leak}$ constant              | $450 \mu\text{M}$                          |

## Membrane Fluxes

Fluxes for each voxel  $p$  ( $p = 1, 2 \dots N_{MEM}$ ) corresponding to the surface sarcolemma and T-tubules are defined for the sodium-Ca<sup>2+</sup>-exchanger ( $J_{NaCa}$ ), membrane Ca<sup>2+</sup> pump ( $J_{pCa}$ ) and background Ca<sup>2+</sup> current ( $J_{Cab}$ ). Membrane voxel  $p$  is associated with cytoplasm voxel  $n$  by the membrane mapping function  $\theta_{MEM}(p)=n$  and inverse map  $\theta_{MEM}^{-1}(n)=p$ .

Sodium-Ca<sup>2+</sup>-exchanger,  $J_{NaCa}$

$${}^p J_{NaCa} = \frac{K_a g_{NaCa} v_{vox}^{-1} \left( e^{\eta z} [Na^+]_i [Ca^{2+}]_o - e^{(\eta-1)z} [Na^+]_o {}^{\theta_{MEM}(p)} [Ca^{2+}]_{cyto} \right)}{(t_1 + t_2 + t_3) (1 + K_{sat} e^{(\eta-1)z})} \quad (75)$$

Where

$$t_1 = K_{mCai} [Na^+]_o^3 \left( 1 + \left( [Na^+]_i / K_{mNai} \right)^3 \right) \quad (76)$$

$$t_2 = K_{mNao}^3 {}^{\theta_{MEM}(p)} [Ca^{2+}]_{cyto} \left( 1 + \left( {}^{\theta_{MEM}(p)} [Ca^{2+}]_{cyto} / K_{mCai} \right) \right) \quad (77)$$

$$t_3 = K_{mCao} [Na^+]_i^3 + [Na^+]_i^3 [Ca^{2+}]_o + [Na^+]_o^3 {}^{\theta_{MEM}(p)} [Ca^{2+}]_{cyto} \quad (78)$$

$$K_a = \left[ 1 + \left( K_{da} / {}^{\theta_{MEM}(p)} [Ca^{2+}]_{cyto} \right) \right] \quad (79)$$

$$z = \frac{V_m F}{RT} \quad (80)$$

Membrane Ca<sup>2+</sup> pump,  $J_{pCa}$

$${}^p J_{pCa} = \left( v_{vox}^{-1} g_{pCa} {}^{\theta_{MEM}(p)} [Ca^{2+}]_{cyto} \right) / \left( K_{mpCa} + {}^{\theta_{MEM}(p)} [Ca^{2+}]_{cyto} \right) \quad (81)$$

Background Ca<sup>2+</sup> current

$${}^p J_{Cab} = v_{vox}^{-1} g_{Cab} (V_m - E_{r,Ca}) \quad (82)$$

**Table S7: Membrane flux parameters**

| Parameter  | Description                                              | Value                                                                                             |
|------------|----------------------------------------------------------|---------------------------------------------------------------------------------------------------|
| $g_{NaCa}$ | Maximal flux rate of Sodium-Ca <sup>2+</sup> exchanger   | 0.13041 $\mu\text{m}^3 \cdot \mu\text{M} \cdot \text{ms}^{-1}$                                    |
| $K_{da}$   | Ca <sup>2+</sup> scaling constant                        | 0.11 $\mu\text{M}$                                                                                |
| $\eta$     | Voltage sensitivity coefficient                          | 0.35                                                                                              |
| $K_{sat}$  | Saturation constant                                      | 0.27                                                                                              |
| $K_{mcai}$ | Intracellular Ca <sup>2+</sup> constant                  | 3.59 $\mu\text{M}$                                                                                |
| $K_{mcao}$ | Extracellular Ca <sup>2+</sup> constant                  | 1.3 mM                                                                                            |
| $K_{mnai}$ | Intracellular Na <sup>+</sup> constant                   | 12.3 mM                                                                                           |
| $K_{mnao}$ | Extracellular Na <sup>+</sup> constant                   | 87.5 mM                                                                                           |
| $g_{pca}$  | Maximal flux rate of PMCA Ca <sup>2+</sup> pump          | 4.795 $\times 10^{-4}$ $\mu\text{m}^3 \cdot \mu\text{M} \cdot \text{ms}^{-1}$                     |
| $g_{cab}$  | Maximal flux rate of background Ca <sup>2+</sup> current | 6.39 $\times 10^{-6}$ $\mu\text{m}^3 \cdot \mu\text{M} \cdot \text{ms}^{-1} \cdot \text{mV}^{-1}$ |
| $[Na^+]_i$ | Intracellular Na <sup>+</sup> concentration              | 7.95 mM                                                                                           |
| $[Na^+]_o$ | Extracellular Na <sup>+</sup> concentration              | 136 mM                                                                                            |

## Complete Equations for the Reaction Terms

Thus, the reaction terms in each of the two diffusively coupled cytoplasm domains (cyto, rbSS) are described by:

$$\left. \begin{aligned} {}^n\phi_{cyto} &= {}^nJ_{SS} \left( v_{ss\_vox} / v_{cyto\_vox} \right) - {}^nJ_{trpn} \\ {}^n\phi_{cyto} &= -({}^qJ_{up} - {}^qJ_{leak}) + {}^nJ_{SS} - {}^nJ_{trpn} \\ {}^n\phi_{cyto} &= {}^pJ_{NaCa} + {}^pJ_{pCa} + {}^pJ_{Cab} + {}^nJ_{SS} - {}^nJ_{trpn} \\ {}^n\phi_{cyto} &= {}^pJ_{NaCa} + {}^pJ_{pCa} + {}^pJ_{Cab} - ({}^qJ_{up} - {}^qJ_{leak}) + {}^nJ_{SS} - {}^nJ_{trpn} \end{aligned} \right\} \begin{aligned} \forall n \notin \theta_{mem}(p) \wedge n \notin \theta_{SR}(q) \\ \forall n \notin \theta_{mem}(p) \wedge n \in \theta_{SR}(q) \\ \forall n \in \theta_{mem}(p) \wedge n \notin \theta_{SR}(q) \\ \forall n \in \theta_{mem}(p) \wedge n \in \theta_{SR}(q) \end{aligned} \quad (83)$$

$$\left. \begin{aligned} {}^n\phi_{rbSS} &= -{}^nJ_{SS} \\ {}^n\phi_{rbSS} &= -{}^nJ_{SS} + {}^mJ_{ds} \left( v_{ds} / v_{rbSS\_vox} \right) \end{aligned} \right\} \begin{aligned} \forall n \notin \theta(m) \\ \forall n \in \theta(m) \end{aligned} \quad (84)$$

Where  $p$  is given by the inverse map  $\theta_{mem}^{-1}(n)$ ,  $q$  is given by the inverse map  $\theta_{SR}^{-1}(n)$  and  $m$  is given by the inverse map  $\theta^{-1}(n)$ .

And in the nSR domain, for all voxels  $n$  which correspond to an nSR voxel  $q$ :

$$\left. \begin{aligned} {}^q\phi_{nSR} &= ({}^qJ_{up} - {}^qJ_{leak}) \left( v_{cyto\_vox} / v_{nSR\_vox} \right) \\ {}^q\phi_{nSR} &= ({}^qJ_{up} - {}^qJ_{leak}) \left( v_{cyto\_vox} / v_{nSR\_vox} \right) + {}^mJ_{jSR} \left( v_{jSR} / v_{nSR\_vox} \right) \end{aligned} \right\} \begin{aligned} \forall q \notin \theta(m) \\ \forall q \in \theta(m) \end{aligned} \quad (85)$$

Where  $n$  is given by the map  $\theta_{SR}(q)$  to define  $m$  from the inverse map  $\theta^{-1}(n)$ .

For computational efficiency, membrane, SR and dyad fluxes are computed only for voxels  $n$  given by the appropriate map; the reaction term is calculated by summing reaction terms given over individual loops of each set.

## Ionic Model

The simplified ionic model uses currents from recent cell models (Colman et al [13], O'Hara-Rudy [14]) without the inclusion of additional factors such as phosphorylation. Modified equations are as follows:

All gates updated by:

$$y|_{t=t_{n+1}} = y_{\infty} - (y_{\infty} - y|_{t=t_n}) e^{-dt/\tau_y} \quad (86)$$

$I_{Na}$ :

$$I_{Na} = 16.m^3.h.j(V_m - E_{Na}) \quad (87)$$

$$\alpha_m = 0.32(V_m + 47.13) / \left( 1 - e^{0.1(V_m + 47.13)} \right) \quad (88)$$

$$\beta_m = 0.08e^{-V_m/11} \quad (89)$$

$$\alpha_h = \begin{cases} 0.135e^{(V_m + 80)/-6.8} & V_m < -40mV \\ 0 & V_m \geq -40mV \end{cases} \quad (90)$$

$$\beta_h = \begin{cases} 3.56e^{0.079V_m} + 310000e^{0.35V_m} & V_m < -40mV \\ \left[0.13\left(1 + e^{\frac{V_m+10.66}{-11.1}}\right)\right]^{-1} & V_m \geq -40mV \end{cases} \quad (91)$$

$$\alpha_j = \begin{cases} \left(-127140e^{0.2444V_m} - 0.00003474e^{-0.04391V_m}\right)\left(\frac{V_m + 37.78}{1 + e^{0.311(V_m + 79.23)}}\right) & V_m < -40mV \\ 0 & V_m \geq -40mV \end{cases} \quad (92)$$

$$\beta_j = \begin{cases} 0.1212e^{-0.01052V_m}/\left(1 + e^{-0.1378(V_m+40.14)}\right) & V_m < -40mV \\ 0.3e^{2.525 \times 10^{-7}V_m}/\left(1 + e^{-0.1(V_m+32)}\right) & V_m \geq -40mV \end{cases} \quad (93)$$

$I_o$ :

$$I_{to} = 0.02.a.i.(V_m - E_k) \quad (94)$$

$$a_\infty = 1.0/\left(1 + e^{-(V_m - 14.34)/14.82}\right) \quad (95)$$

$$\tau_a = 1.0515/\left(\left[1.2089\left(1 + e^{-(V_m - 19.4099)/29.3814}\right)\right]^{-1} + 3.5/1 + e^{(V_m+100)/29.3814}\right) \quad (96)$$

$$i_\infty = 1.0/\left(1 + e^{(V_m+43.94)/5.711}\right) \quad (97)$$

$$\tau_{i,fast} = 4.562 + 1.0/\left(0.3933e^{-(V_m+100)/100} + 0.08004e^{(V_m+50)/16.59}\right) \quad (98)$$

$$\tau_{i,slow} = 23.62 + 1.0/\left(0.0014516e^{-(V_m+96.52)/59.05} + 1.78 \times 10^{-8} e^{(V_m+114.1)/8.079}\right) \quad (99)$$

$$A_{i,fast} = 1.0/\left(1 + e^{(V_m - 213.6)/151.2}\right) \quad (100)$$

$$i = A_{i,fast}.i_{fast} + (1 - A_{i,fast})i_{slow} \quad (101)$$

$I_{KS}$ :

$$I_{KS} = 1.955 \times 10^{-3}.Ks_{Ca}.xs_1.xs_2.(V_m - E_k) \quad (102)$$

$$xs_{1,\infty} = 1.0/\left(1.0 + e^{-(V_m+11.60)/8.932}\right) \quad (103)$$

$$\tau_{xs1} = 817.3 + 1.0/\left(2.32 \times 10^{-4} e^{(V_m+48.28)/17.80} + 0.001292e^{-(V_m+210.0)/230.0}\right) \quad (104)$$

$$xs_{2,\infty} = xs_{1,\infty} \quad (105)$$

$$\tau_{xs2} = 1.0/\left(0.01e^{(V_m-50.0)/2.0.0} + 0.0193e^{-(V_m+66.54)/31.0}\right) \quad (106)$$



$$Ks_{Ca} = 1.0 + 0.6 / \left( 1 + \left( \frac{3.8 \times 10^{-5}}{[Ca^{2+}]_{CYTO}} \right)^{1.4} \right) \quad (107)$$

$I_{Kr}$ :

$$I_{Kr} = 0.03174 \cdot \sqrt{[K^+]_O} / 5.4 \cdot xr \cdot rkr \cdot (V_m - E_k) \quad (108)$$

$$xr_\infty = 1.0 / \left( 1.0 + e^{-(V_m + 8.337)/6.789} \right) \quad (109)$$

$$\tau_{xr,fast} = 12.98 + 1.0 / \left( 0.3652 e^{(V_m - 31.66)/3.869} + 4.123 \times 10^{-5} e^{-(V_m - 47.78)/20.38} \right) \quad (110)$$

$$\tau_{xr,slow} = 1.865 + 1.0 / \left( 0.06629 e^{(V_m - 34.7)/7.355} + 1.128 \times 10^{-5} e^{-(V_m - 29.74)/25.94} \right) \quad (111)$$

$$A_{xr,fast} = 1.0 / \left( 1.0 + e^{(V_m + 54.81)/38.21} \right) \quad (112)$$

$$xr = A_{xr,fast} xr_{fast} + (1 - A_{xr,fast}) xr_{slow} \quad (113)$$

$$rkr = \left( 1.0 + e^{(V_m + 55.0)/75.0} \right)^{-1} \left( 1.0 + e^{(V_m - 10)/30.0} \right)^{-1} \quad (114)$$

$I_{K1}$ :

$$I_{K1} = 0.178398 \cdot \sqrt{[K^+]_O} \cdot rk1 \cdot xk1 \cdot (V_m - E_k) \quad (115)$$

$$xk1_\infty = 1.0 / \left( 1.0 + e^{-(V_m + 2.5538[K^+]_O + 144.59)/(1.5692[K^+]_O + 3.8115)} \right) \quad (116)$$

$$\tau_{xk1} = 122.2 / \left( e^{-(V_m + 127.2)/20.36} + e^{(V_m + 236.8)/69.33} \right) \quad (117)$$

$$rk1 = 1.0 / \left( 1.0 + e^{(V_m + 105.8 - 2.6[K^+]_O)/9.493} \right) \quad (118)$$

## Initial Conditions

**Table S8: Initial conditions of Ca<sup>2+</sup> handling model (control pacing)**

| <b>Variable</b>    | <b>Initial value</b>   |
|--------------------|------------------------|
| $[Ca^{2+}]_{ds}$   | 0.08 $\mu$ M           |
| $[Ca^{2+}]_{rbSS}$ | 0.08 $\mu$ M           |
| $[Ca^{2+}]_{cyto}$ | 0.08 $\mu$ M           |
| $[Ca^{2+}]_{nSR}$  | 0.8 mM                 |
| $[Ca^{2+}]_{jSR}$  | 0.8 mM                 |
| CA                 | 1.0                    |
| $d_1, f_1, fca_1$  | 1.0                    |
| $V_m$              | -90 mV                 |
| $P_0$              | $1.667 \times 10^{-3}$ |
| $P_1$              | $1.441 \times 10^{-3}$ |
| $P_2$              | $2.692 \times 10^{-3}$ |
| $P_3$              | $2.344 \times 10^{-3}$ |
| $N_0$              | $9.904 \times 10^{-3}$ |
| $N_1$              | $1.435 \times 10^{-3}$ |
| $[TRPN_{Ca}^L]$    | 0.0181                 |
| $[TRPN_{Ca}^H]$    | 0.1305                 |

## References

1. Hinch R. A mathematical analysis of the generation and termination of calcium sparks. *Biophys J*. 2004 Mar;86(3):1293–307.
2. Restrepo JG, Weiss JN, Karma A. Calsequestrin-mediated mechanism for cellular calcium transient alternans. *Biophys J*. 2008 Oct;95(8):3767–89.
3. Nivala M, de Lange E, Rovetti R, Qu Z. Computational modeling and numerical methods for spatiotemporal calcium cycling in ventricular myocytes. *Front Physiol*. 2012;3:114.
4. Wagner J, Keizer J. Effects of rapid buffers on Ca<sup>2+</sup> diffusion and Ca<sup>2+</sup> oscillations. *Biophys J*. 1994 Jul;67(1):447–56.
5. Gaur N, Rudy Y. Multiscale modeling of calcium cycling in cardiac ventricular myocyte: macroscopic consequences of microscopic dyadic function. *Biophys J*. 2011 Jun 22;100(12):2904–12.
6. Gauthier LD, Greenstein JL, Winslow RL. Toward an integrative computational model of the Guinea pig cardiac myocyte. *Front Physiol*. 2012;3:244.
7. Rice JJ, Winslow RL, Hunter WC. Comparison of putative cooperative mechanisms in cardiac muscle: length dependence and dynamic responses. *Am J Physiol*. 1999 May;276(5 Pt 2):H1734-1754.
8. Stern MD, Song LS, Cheng H, Sham JS, Yang HT, Boheler KR, et al. Local control models of cardiac excitation-contraction coupling. A possible role for allosteric interactions between ryanodine receptors. *J Gen Physiol*. 1999 Mar;113(3):469–89.
9. Luo CH, Rudy Y. A dynamic model of the cardiac ventricular action potential. I. Simulations of ionic currents and concentration changes. *Circ Res*. 1994 Jun;74(6):1071–96.
10. Song Z, Ko CY, Nivala M, Weiss JN, Qu Z. Calcium-voltage coupling in the genesis of early and delayed afterdepolarizations in cardiac myocytes. *Biophys J*. 2015 Apr 21;108(8):1908–21.
11. Shiferaw Y, Watanabe MA, Garfinkel A, Weiss JN, Karma A. Model of intracellular calcium cycling in ventricular myocytes. *Biophys J*. 2003 Dec;85(6):3666–86.
12. Shannon TR, Wang F, Puglisi J, Weber C, Bers DM. A mathematical treatment of integrated Ca dynamics within the ventricular myocyte. *Biophys J*. 2004 Nov;87(5):3351–71.
13. Colman MA, Aslanidi OV, Kharche S, Boyett MR, Garratt C, Hancox JC, et al. Pro-arrhythmogenic effects of atrial fibrillation-induced electrical remodelling: insights from the three-dimensional virtual human atria. *J Physiol*. 2013 Sep 1;591(17):4249–72.
14. O’Hara T, Virág L, Varró A, Rudy Y. Simulation of the undiseased human cardiac ventricular action potential: model formulation and experimental validation. *PLoS Comput Biol*. 2011 May;7(5):e1002061.
