# Supplementary material for: A computational model of spatio-temporal cardiac intracellular calcium handling with realistic structure and spatial flux distribution from sarcoplasmic reticulum and t-tubule reconstructions
Source: PubMed Central journal article supplement (PMC5597258; doi:10.1371/journal.pcbi.1005714), 2017-08-31
Supplement: pcbi.1005714.s003.pdf [file pcbi.1005714.s003.pdf]

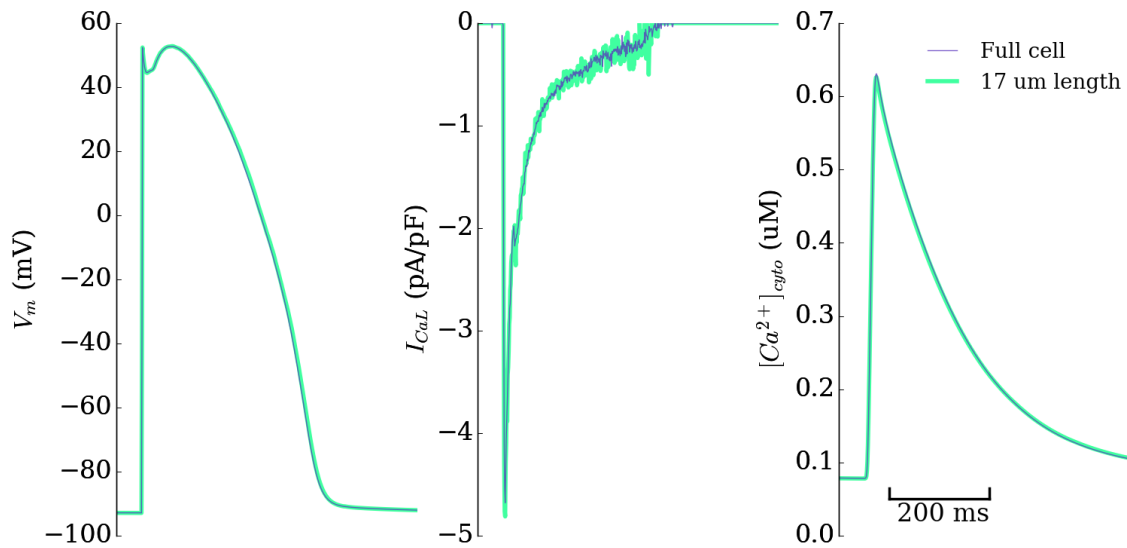

**Fig 1: Comparison between the full-sized cell model and the cross-sectional portion cell model.** Membrane potential (left),  $I_{CaL}$  (middle) and average  $Ca^{2+}$  transient (right) traces from the full length cell model (purple thin line) and a small portion of length 17  $\mu\text{m}$  (green thick line).
