# Supplementary material for: A computational model of spatio-temporal cardiac intracellular calcium handling with realistic structure and spatial flux distribution from sarcoplasmic reticulum and t-tubule reconstructions
Source: PubMed Central journal article supplement (PMC5597258; doi:10.1371/journal.pcbi.1005714), 2017-08-31
Supplement: pcbi.1005714.s004.pdf [file pcbi.1005714.s004.pdf]

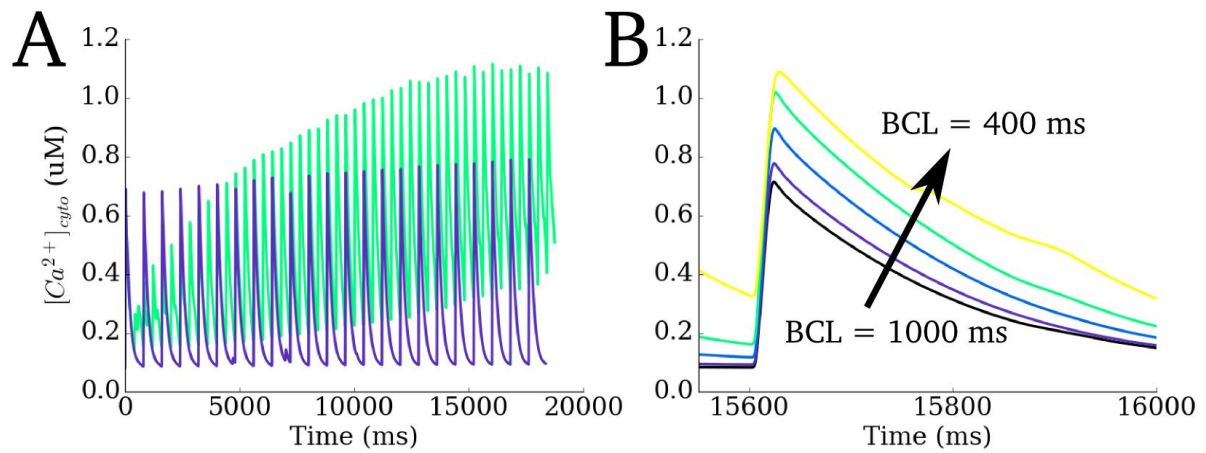

**Fig 2: Rate-dependence of the intracellular Ca<sup>2+</sup> transient.** A – Ca<sup>2+</sup> transient during long term pacing from initial conditions at BCL = 800 ms (purple) and 400 ms (green). B – Ca<sup>2+</sup> transient for a single beat (steady state) for multiple BCLs.
