# Supplementary material for: A computational model of spatio-temporal cardiac intracellular calcium handling with realistic structure and spatial flux distribution from sarcoplasmic reticulum and t-tubule reconstructions
Source: PubMed Central journal article supplement (PMC5597258; doi:10.1371/journal.pcbi.1005714), 2017-08-31
Supplement: pcbi.1005714.s005.pdf [file pcbi.1005714.s005.pdf]

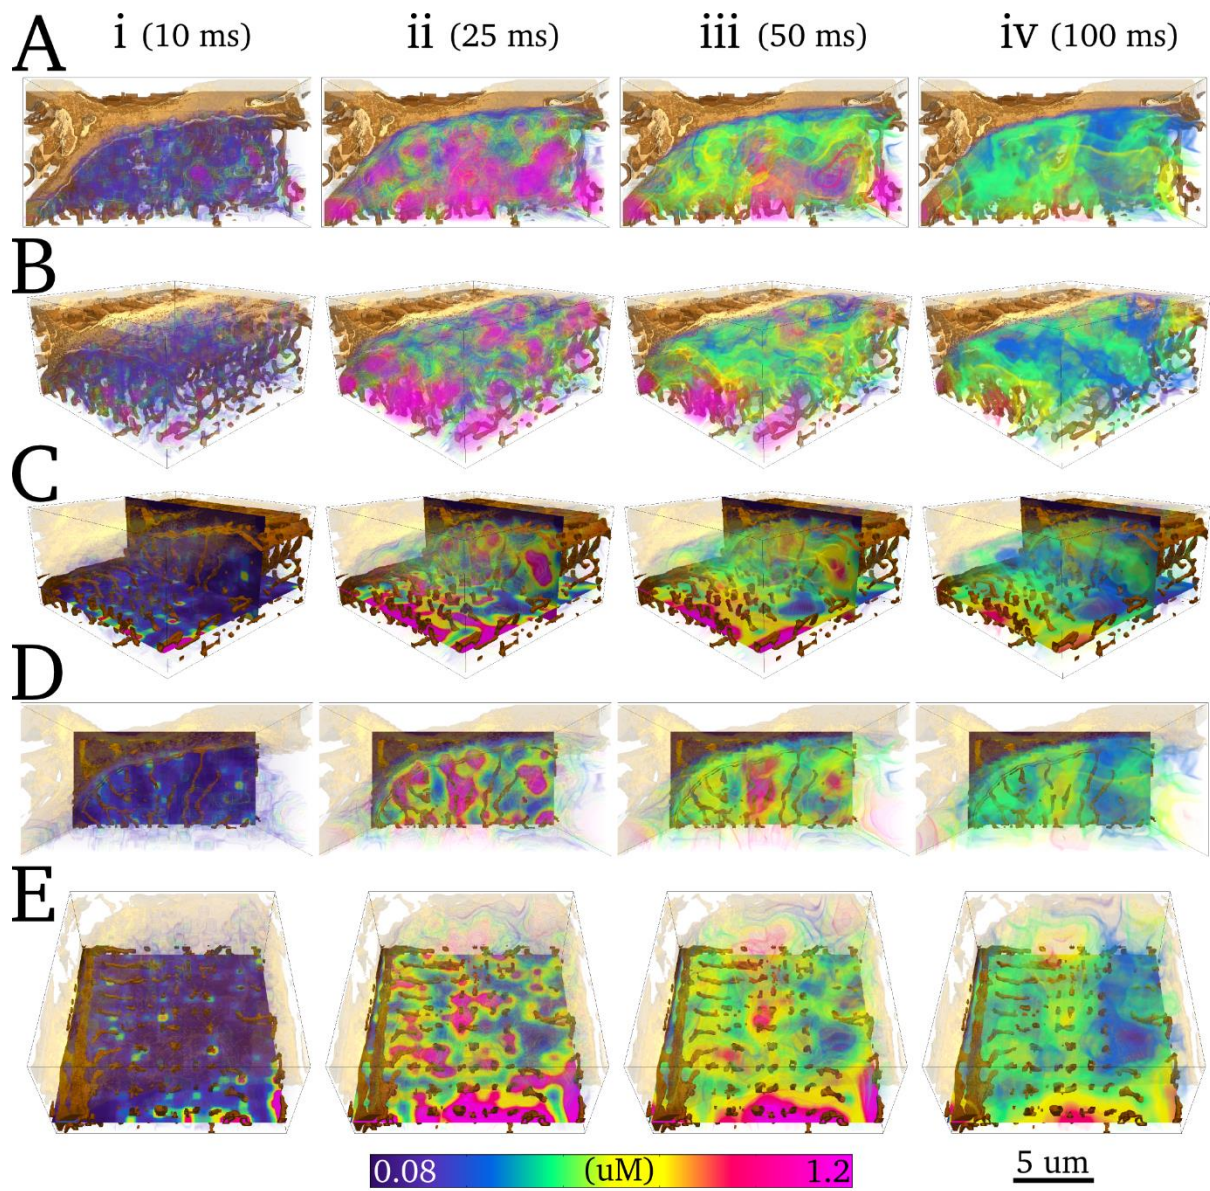

Fig 3: Further renders of  $\text{Ca}^{2+}$  gradients in 3-D.
