# Supplementary material for: A computational model of spatio-temporal cardiac intracellular calcium handling with realistic structure and spatial flux distribution from sarcoplasmic reticulum and t-tubule reconstructions
Source: PubMed Central journal article supplement (PMC5597258; doi:10.1371/journal.pcbi.1005714), 2017-08-31
Supplement: pcbi.1005714.s006.pdf [file pcbi.1005714.s006.pdf]

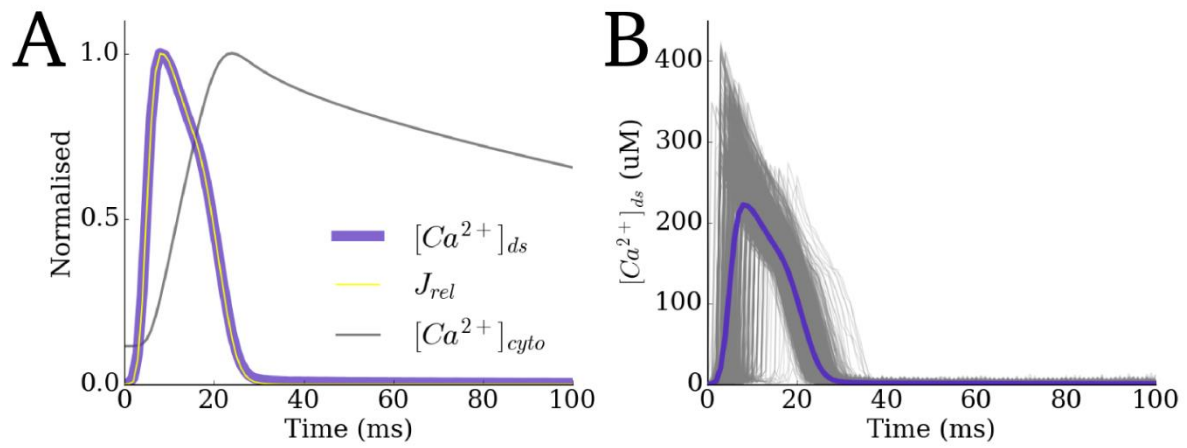

**Fig 4:  $J_{rel}$  and single dyad dynamics.** A – Whole cell averages for  $Ca^{2+}$  concentration in the dyadic cleft (purple) and cytoplasm (grey) and intracellular  $Ca^{2+}$  release,  $J_{rel}$  (yellow). B –  $Ca^{2+}$  concentration in multiple individual dyadic clefts (grey) with the average (purple).
