# Supplementary material for: A computational model of spatio-temporal cardiac intracellular calcium handling with realistic structure and spatial flux distribution from sarcoplasmic reticulum and t-tubule reconstructions
Source: PubMed Central journal article supplement (PMC5597258; doi:10.1371/journal.pcbi.1005714), 2017-08-31
Supplement: pcbi.1005714.s007.pdf [file pcbi.1005714.s007.pdf]

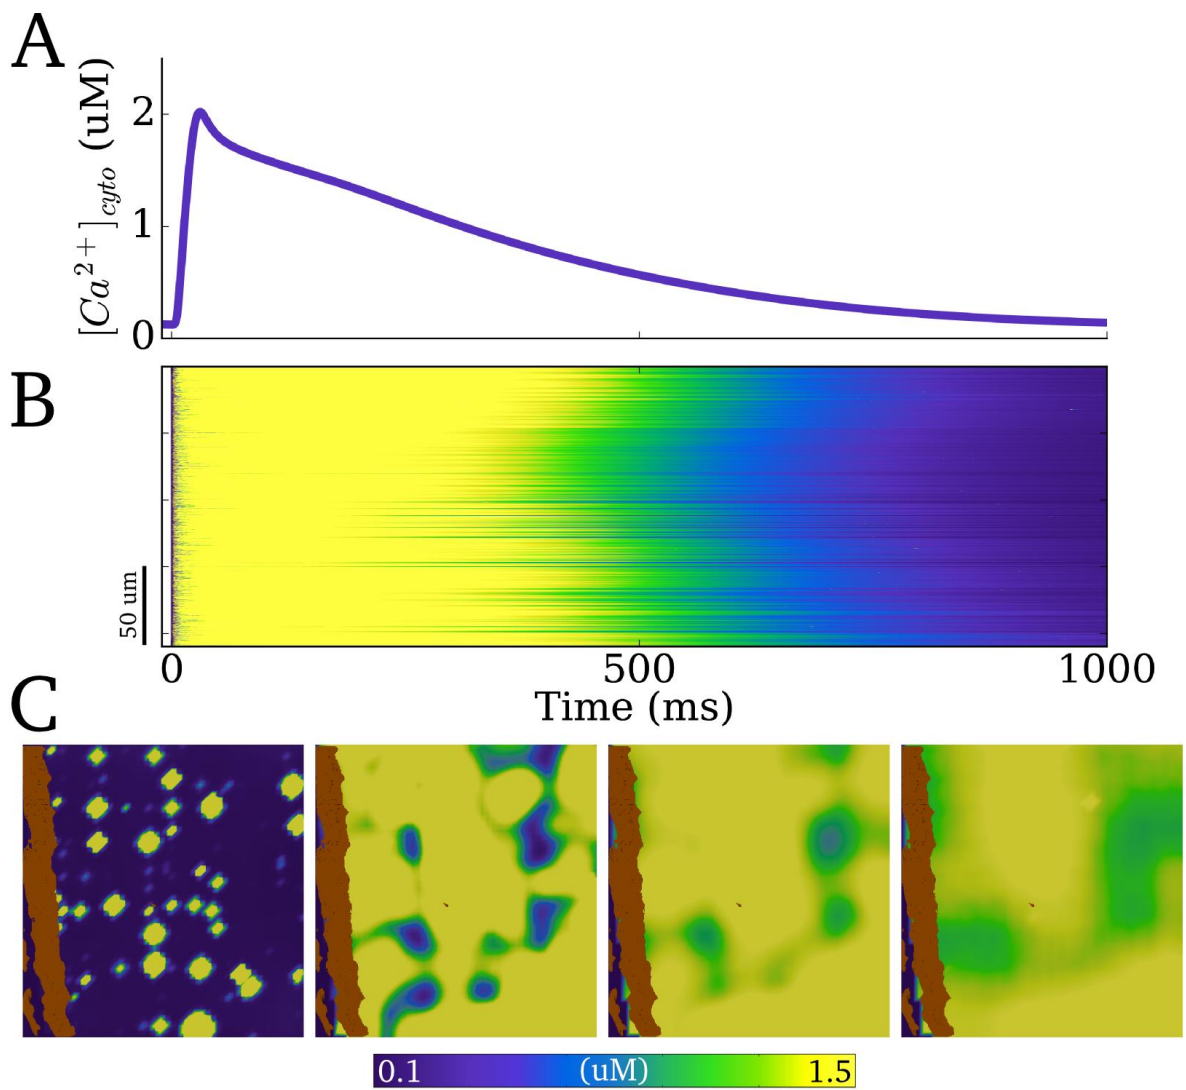

**Fig 5: Spatio-temporal dynamics with the Nivala et al 2012 model showing the same snapshots as in Fig 7.**
