# Supplementary material for: A computational model of spatio-temporal cardiac intracellular calcium handling with realistic structure and spatial flux distribution from sarcoplasmic reticulum and t-tubule reconstructions
Source: PubMed Central journal article supplement (PMC5597258; doi:10.1371/journal.pcbi.1005714), 2017-08-31
Supplement: pcbi.1005714.s008.pdf [file pcbi.1005714.s008.pdf]

A<sup>Normal</sup>

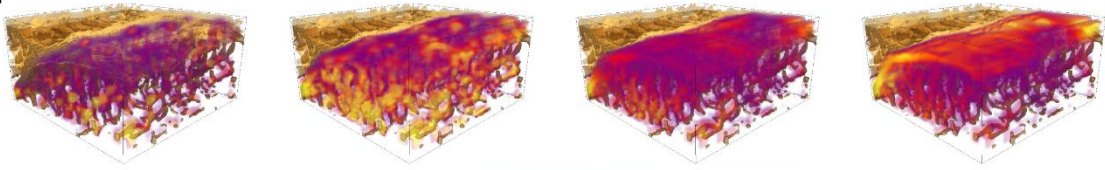

B<sup>TT preferential</sup>

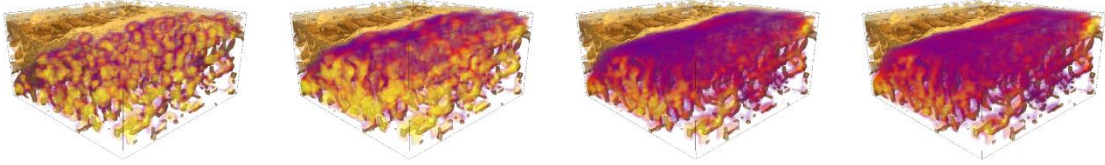

0 (ms<sup>-1</sup>) Normalised -1

Fig 6: Snapshots of INaCa flux distribution in the even and TT-preferentially distributed models.
